# Supplementary material for: Open Dialogue: A Review of the Evidence
Source: Atypon-hosted journal article supplement (doi:10.1176/appi.ps.201800236), 2018-10-18
Supplement: appi.ps.201800236.ds001.pdf [file appi.ps.201800236.ds001.pdf]

 


Psychiatry Online
